# Supplementary material
Source: publisher figshare collection journal article supplement (https://acs.figshare.com/ndownloader/files/3786394)
Supplement: Supplementary file 1 [file 3786394]

# Unexpected spin-crossover at low temperature and low pressure, in an iron(II)/dipyrazolylpyridine complex exhibiting a high-spin Jahn-Teller distortion

*Laurence J. Kershaw Cook<sup>†</sup>, Flora L. Thorp-Greenwood<sup>†</sup>, Tim P. Comyn<sup>¶</sup>, Oscar Cespedes,<sup>§</sup>*

*Guillaume Chastanet<sup>\*‡</sup> and Malcolm A. Halcrow<sup>\*†</sup>*

<sup>†</sup>School of Chemistry, University of Leeds, Woodhouse Lane, Leeds LS2 9JT, UK.

<sup>¶</sup>Institute for Materials Research, School of Process, Environmental and Materials Engineering, University of Leeds, Leeds LS2 9JT, UK.

<sup>§</sup>School of Physics and Astronomy, University of Leeds, E. C. Stoner Building, Leeds LS2 9JT, UK.

<sup>‡</sup>CNRS, Université de Bordeaux, ICMCB, UPR 9048, F-33600 Pessac, France.

## Supporting Information

## Definitions of the structural distortion parameters discussed in the paper.

**Table S1** Selected bond lengths and angles in the crystal structures of **1**·4MeNO<sub>2</sub> and **2**·4MeNO<sub>2</sub>.

**Table S2** Selected bond lengths and angles in the crystal structures of solvent-free **2** and **3**.

**Figure S1** Two view of the packing diagram of **1**·4MeNO<sub>2</sub>, showing the channels of anions and solvent running parallel to *c*.

**Figure S2** Packing diagram of **2**, showing a side-on view of the terpyridine embrace layers in the lattice.

**Table S3** Metric parameters for the intermolecular  $\pi$ - $\pi$  interactions in the terpyridine embrace layers in **2**.

**Figure S3** Differential scanning calorimetry (DSC) trace of **1**.

**Figure S4** Variable temperature X-ray powder patterns from **1** at 10-20 Torr pressure.

**Figure S5** Variable temperature X-ray powder patterns from **2** at 10-20 Torr pressure.

**Figure S6** Comparison of the high-spin structure of **2**, with the overlaid high-spin and low-spin molecular structures of **5** and **6**.

**Table S4** Structural changes taking place during spin-crossover for [Fe(1-bpp)<sub>2</sub>]<sup>2+</sup> and its derivatives, whose high-spin and low-spin crystal structures are available.

**Chart S1** Ligands referred to in Table S4.

**Figure S7** Plots of  $T_{1/2}$  for solid [Fe(1-bpp)<sub>2</sub>]<sup>2+</sup> derivatives against the distortion parameters  $\theta$ ,  $\phi$ ,  $\Sigma$  and  $\Theta$  of the high-spin state of the complexes.

**Figure S8** Relationship between  $T_{1/2}$  and  $T(\text{LIESST})$  for compounds from the [Fe(1-bpp)<sub>2</sub>]<sup>2+</sup> series, measured by these authors.

**Figure S9** Variable temperature magnetic susceptibility data for **3** and **4**·½H<sub>2</sub>O.

## References

## Definitions of the structural parameters discussed in the paper.

The Jahn-Teller distortion parameters  $\phi$  and  $\theta$  are shown in Chart 1 of the main article.

$\alpha$  is the average of the four internal *cis*-N–Fe–N angles within the two chelate ligands, which increases from *ca.* 73° in the high-spin state to 80° in the low-spin state.

$\Sigma$  and  $\Theta$  are defined as follows:

$$\Sigma = \sum_{i=1}^{12} |90 - \beta_i| \qquad \Theta = \sum_{j=1}^{24} |60 - \gamma_j|$$

where  $\beta_i$  are the twelve *cis*-N–Fe–N angles about the iron atom and  $\gamma_j$  are the 24 unique N–Fe–N angles measured on the projection of two triangular faces of the octahedron along their common pseudo-threefold axis (Scheme S1).  $\Sigma$  is a general measure of the deviation of a metal ion from an ideal octahedral geometry, while  $\Theta$  more specifically indicates its distortion towards a trigonal prismatic structure. A perfectly octahedral complex gives  $\Sigma = \Theta = 0$ .

$\Sigma$  and  $\Theta$  were originally introduced to quantify small differences in the coordination geometries of high-spin iron(II) complexes of polydentate ligands.<sup>1</sup> More recently, they were popularized by Guionneau *et al.* as a way of confirming the spin state of a metal ion in a crystal structure; and to quantify the magnitude of the structural changes taking place during spin-crossover through  $\Delta\Sigma$  and  $\Delta\Theta$ , the differences in these parameters between the high- and low-spin states of the complex.<sup>2</sup>

Because the high-spin state of a complex has a much more plastic structure than the low-spin, this is reflected in  $\Sigma$  and  $\Theta$  which are usually much larger in the high-spin state. The absolute values of these parameters depend on the metal/ligand combination in the compound under investigation, however.<sup>3</sup> Typical values for these parameters for  $[\text{Fe}(\text{bpp})_2]^{2+}$  complexes are tabulated in ref. 4.

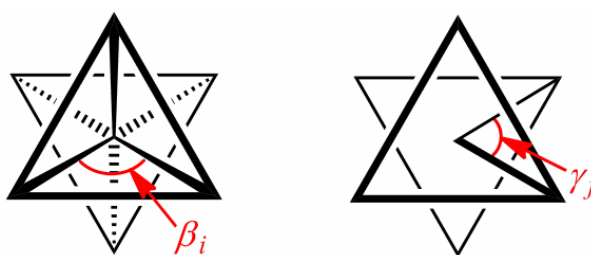

**Scheme S1.** Angles used in the definitions of the coordination distortion parameters  $\Sigma$  and  $\Theta$ .

$\Sigma$  and  $\Theta$  (and  $\Delta\Sigma$  and  $\Delta\Theta$ ) are measures of the change in the metal ion coordination sphere between the spin states. In contrast,  $\phi$  and  $\theta$  (and  $\Delta\phi$  and  $\Delta\theta$ ) quantify the change in shape of the molecule as a whole during spin-crossover, by describing the disposition of the organic ligands with respect to each other.

**Table S1** Selected bond lengths and angles in the crystal structures of **1**·4MeNO<sub>2</sub> and **2**·4MeNO<sub>2</sub> (Å, °). See Fig. 2 of the main article for the atom numbering scheme employed. Symmetry codes: (i)  $\frac{3}{2}-x, 2-z$ ; (ii)  $2-x, 1-y, z$ ; (iii)  $\frac{1}{2}+y, -\frac{1}{2}+x, 2-z$ .

|                                           | <b>1</b> ·4MeNO <sub>2</sub> | <b>2</b> ·4MeNO <sub>2</sub> |
|-------------------------------------------|------------------------------|------------------------------|
| Fe(1)–N(2)                                | 1.894(5)                     | 1.894(2)                     |
| Fe(1)–N(7)                                | 1.981(5)                     | 1.971(2)                     |
| N(2)–Fe(1)–N(7)                           | 79.78(13)                    | 80.05(6)                     |
| N(2)–Fe(1)–N(2 <sup>ii</sup> ) ( $\phi$ ) | 180                          | 180                          |
| N(2)–Fe(1)–N(7 <sup>ii</sup> )            | 100.22(12)                   | 99.95(6)                     |
| N(7)–Fe(1)–N(7 <sup>i</sup> )             | 159.6(2)                     | 160.11(11)                   |
| N(7)–Fe(1)–N(7 <sup>ii</sup> )            | 91.7(3)                      | 92.15(12)                    |
| N(7)–Fe(1)–N(7 <sup>iii</sup> )           | 92.0(3)                      | 91.27(12)                    |
| $\theta$                                  | 90                           | 90                           |

**Table S2** Selected bond lengths and angles in the crystal structures of solvent-free **2** and **3** (Å, °). See Fig. 2 of the main article for the atom numbering scheme employed. Symmetry code: (iv)  $-x, y, \frac{1}{2}-z$ .

| <b>2</b>                    | 100 K      | 240 K    | <b>3</b>                                  |            |
|-----------------------------|------------|----------|-------------------------------------------|------------|
| Fe(1)–N(2)                  | 2.1236(19) | 2.126(6) | Fe(1)–N(2)                                | 2.1479(15) |
| Fe(1)–N(9)                  | 2.1735(19) | 2.182(7) | Fe(1)–N(9)                                | 2.1774(16) |
| Fe(1)–N(14)                 | 2.1893(19) | 2.182(7) | Fe(1)–N(14)                               | 2.1877(16) |
| Fe(1)–N(19)                 | 2.1354(19) | 2.137(6) |                                           |            |
| Fe(1)–N(26)                 | 2.2417(19) | 2.241(7) |                                           |            |
| Fe(1)–N(31)                 | 2.1642(18) | 2.159(6) |                                           |            |
| N(2)–Fe(1)–N(9)             | 73.76(7)   | 74.1(2)  | N(2)–Fe(1)–N(9)                           | 72.88(6)   |
| N(2)–Fe(1)–N(14)            | 73.36(7)   | 73.6(2)  | N(2)–Fe(1)–N(14)                          | 72.57(6)   |
| N(2)–Fe(1)–N(19) ( $\phi$ ) | 160.06(7)  | 163.7(2) | N(2)–Fe(1)–N(2 <sup>iv</sup> ) ( $\phi$ ) | 157.92(9)  |
| N(2)–Fe(1)–N(26)            | 88.55(7)   | 91.7(3)  | N(2)–Fe(1)–N(9 <sup>iv</sup> )            | 91.03(6)   |
| N(2)–Fe(1)–N(31)            | 124.92(7)  | 121.7(2) | N(2)–Fe(1)–N(14 <sup>iv</sup> )           | 125.17(6)  |
| N(9)–Fe(1)–N(14)            | 146.70(7)  | 147.3(3) | N(9)–Fe(1)–N(14)                          | 143.75(6)  |
| N(9)–Fe(1)–N(19)            | 112.53(7)  | 109.4(3) |                                           |            |
| N(9)–Fe(1)–N(26)            | 95.02(7)   | 93.7(3)  | N(9)–Fe(1)–N(9 <sup>iv</sup> )            | 87.60(9)   |
| N(9)–Fe(1)–N(31)            | 99.74(7)   | 99.0(3)  | N(9)–Fe(1)–N(14 <sup>iv</sup> )           | 103.63(6)  |
| N(14)–Fe(1)–N(19)           | 100.25(7)  | 103.0(3) |                                           |            |
| N(14)–Fe(1)–N(26)           | 89.27(7)   | 91.8(3)  |                                           |            |
| N(14)–Fe(1)–N(31)           | 94.70(7)   | 94.0(3)  | N(14)–Fe(1)–N(14 <sup>iv</sup> )          | 87.58(9)   |
| N(19)–Fe(1)–N(26)           | 72.29(7)   | 72.3(3)  |                                           |            |
| N(19)–Fe(1)–N(31)           | 73.79(7)   | 74.1(2)  |                                           |            |
| N(26)–Fe(1)–N(31)           | 146.02(7)  | 146.4(3) |                                           |            |
| $\theta$                    | 89.62(2)   | 89.48(7) | $\theta$                                  | 67.70(2)   |

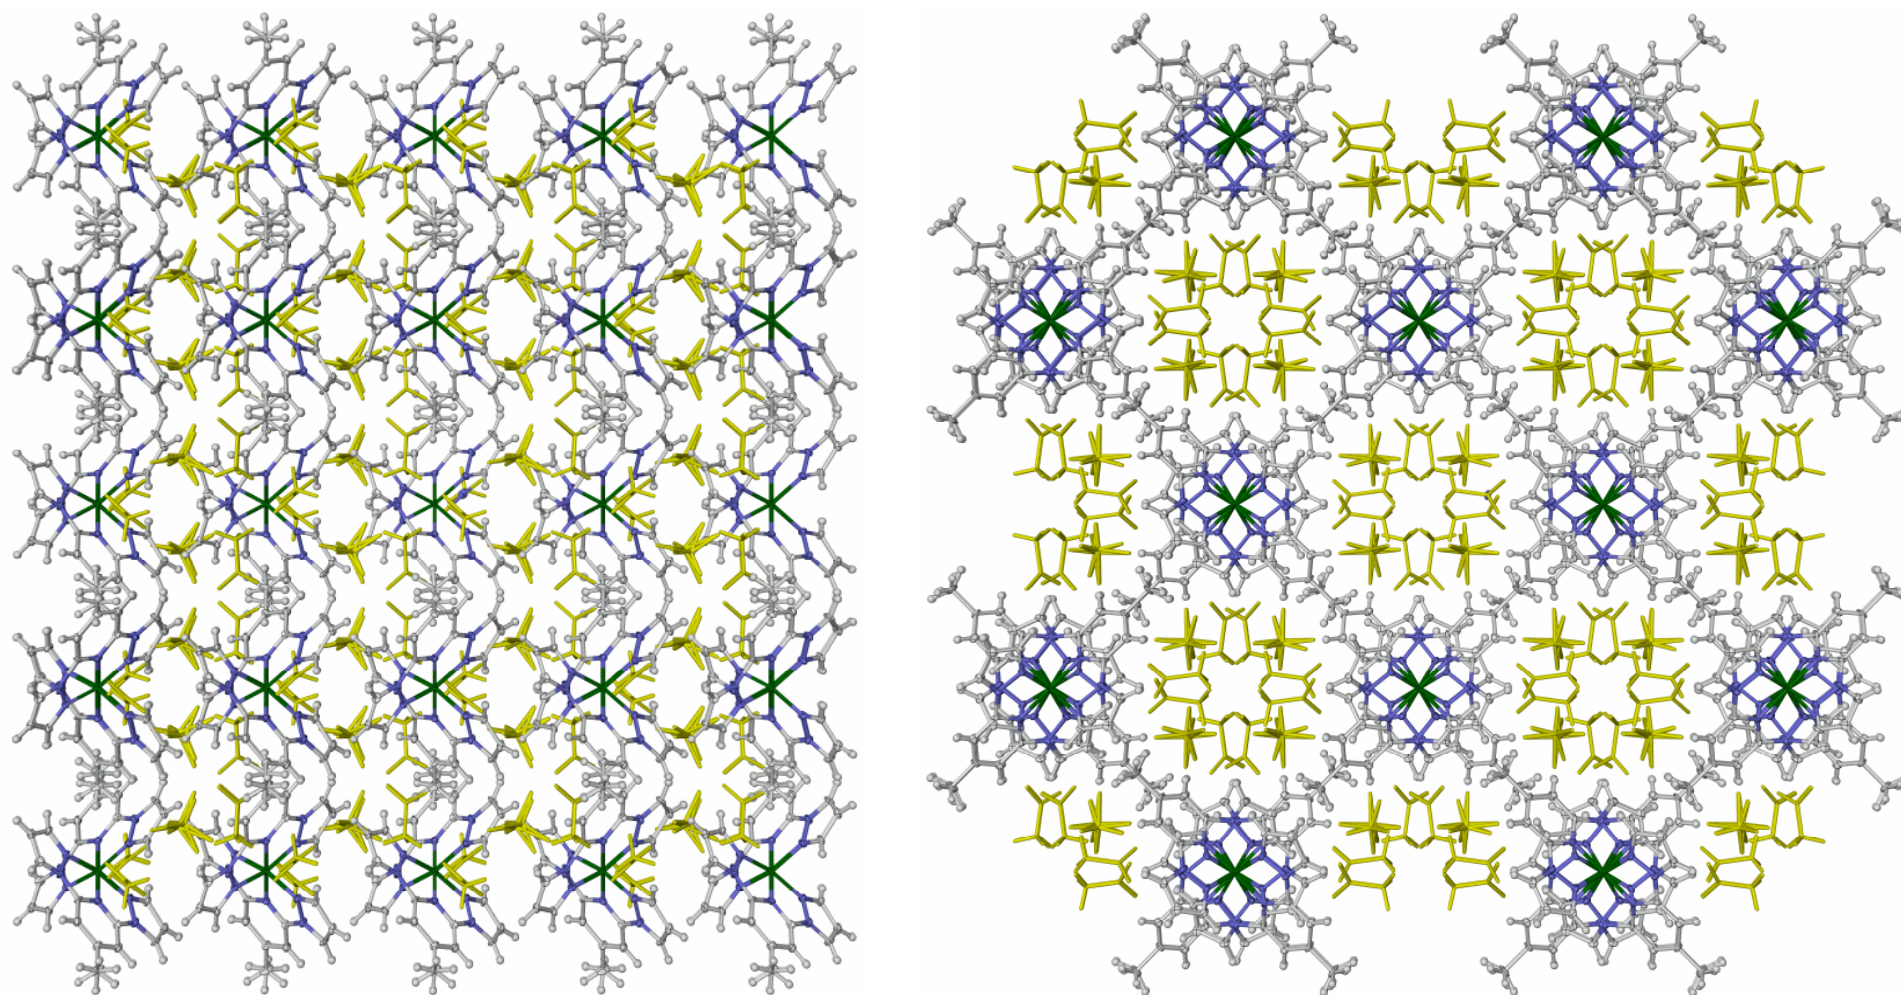

**Figure S1** Two views of the packing diagram of  $1 \cdot 4\text{MeNO}_2$ , showing the channels of anions and solvent running parallel to  $c$ . The views are perpendicular to the (100) (left) and (001) (right) crystal planes. The atoms in the complex dication have 50 % displacement ellipsoids, while the anions and solvent are de-emphasized for clarity. Only one of the two disorder orientations of the unique nitromethane molecule is shown, but two disorder sites of the methyl H atoms and the  $\text{BF}_4^-$  ions (which both span crystallographic  $C_2$  axes) have been generated by the program.

Color code: C{complex}, white; H{complex}, pale grey; N{complex}, blue; Fe, green;  $\text{BF}_4^-$  and  $\text{CH}_3\text{NO}_2$ , yellow.

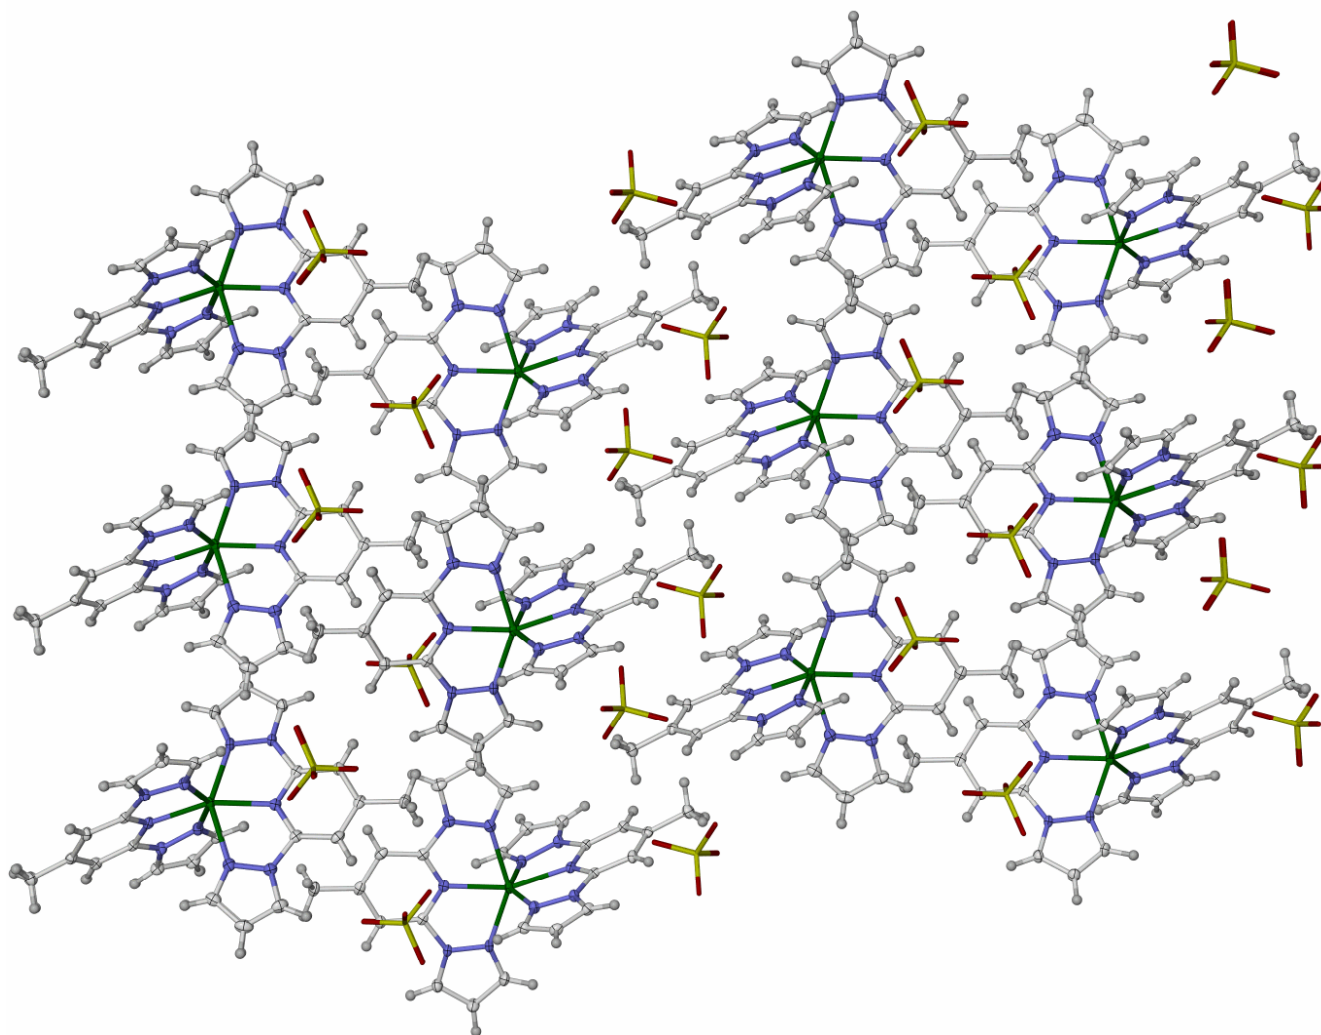

**Figure S2** Packing diagram of **2**, showing a side-on view of the terpyridine embrace layers in the lattice. The view is perpendicular to the (010) plane, with *c* horizontal. An alternative view of this crystal packing is in Figure 3 of the main article.

**Table S3** Metric parameters for the intermolecular  $\pi$ - $\pi$  interactions in the terpyridine embrace layers in **2** (Å, °). See Figs. 2 and 3 of the main article. Symmetry codes: (v)  $x, 1+y, z$ ; (vi)  $-1+x, y, z$ .

|                                                             | Dihedral angle | Interplanar distance | Horizontal offset |
|-------------------------------------------------------------|----------------|----------------------|-------------------|
| <i>T</i> = 100 K                                            |                |                      |                   |
| [N(8)–C(12)]...[N(13 <sup>v</sup> )–C(17 <sup>v</sup> )]    | 5.92(15)       | 3.358(9)             | 1.65              |
| [N(25)–C(29)]...[N(30 <sup>vi</sup> )–C(34 <sup>vi</sup> )] | 8.07(13)       | 3.451(7)             | 1.15              |
| <i>T</i> = 240 K                                            |                |                      |                   |
| [N(8)–C(12)]...[N(13 <sup>v</sup> )–C(17 <sup>v</sup> )]    | 5.9(6)         | 3.45(3)              | 1.65              |
| [N(25)–C(29)]...[N(30 <sup>vi</sup> )–C(34 <sup>vi</sup> )] | 4.9(5)         | 3.49(3)              | 1.34              |

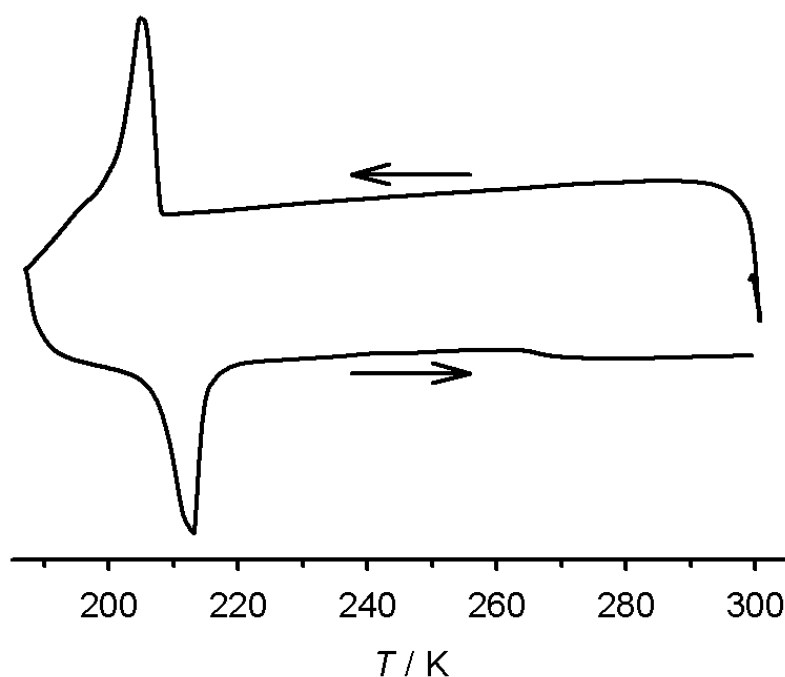

**Figure S3** Differential scanning calorimetry (DSC) trace of **1** showing its abrupt, hysteretic spin-transition. The temperature ramp was 5 K min<sup>-1</sup>.

A similar scan of **2** was featureless, because its spin-transition temperature in cooling mode ( $T_{1/2\downarrow} = 175$  K) is below the minimum temperature accessible with this calorimeter (185 K).

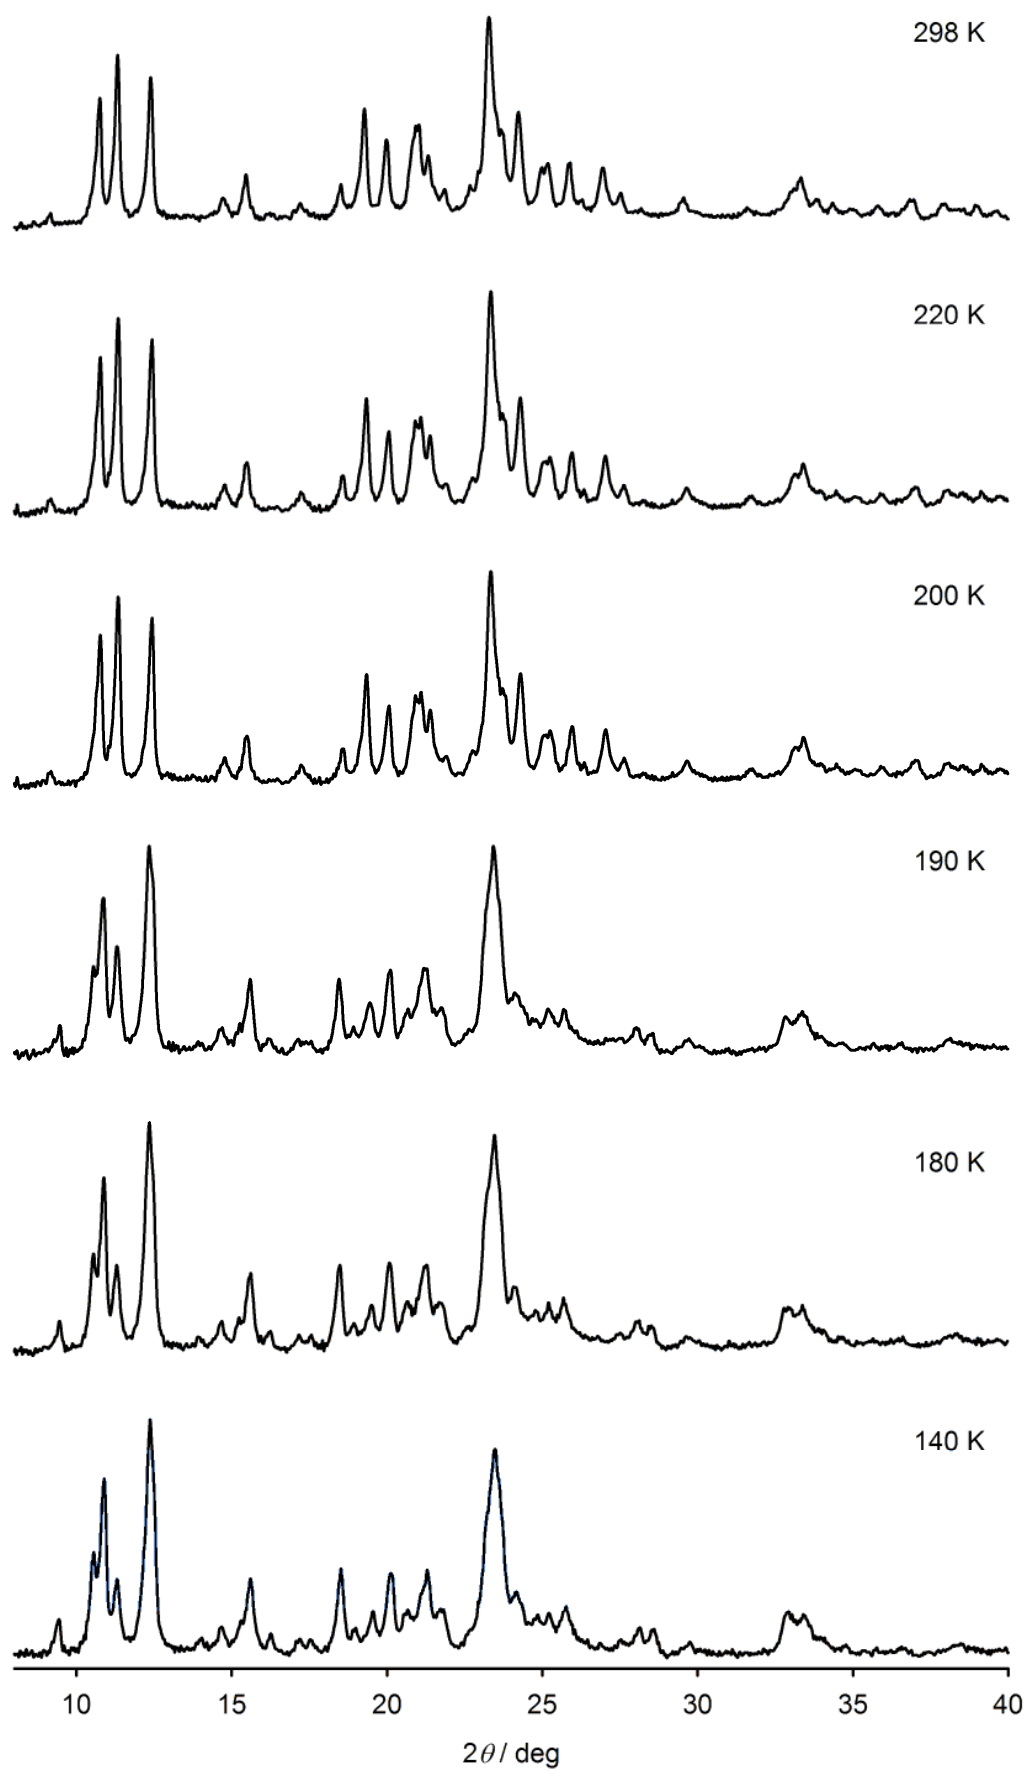

**Figure S4** Variable temperature X-ray powder patterns from **1** at 10-20 Torr pressure. The data are the same as in Fig. 5 of the main article.



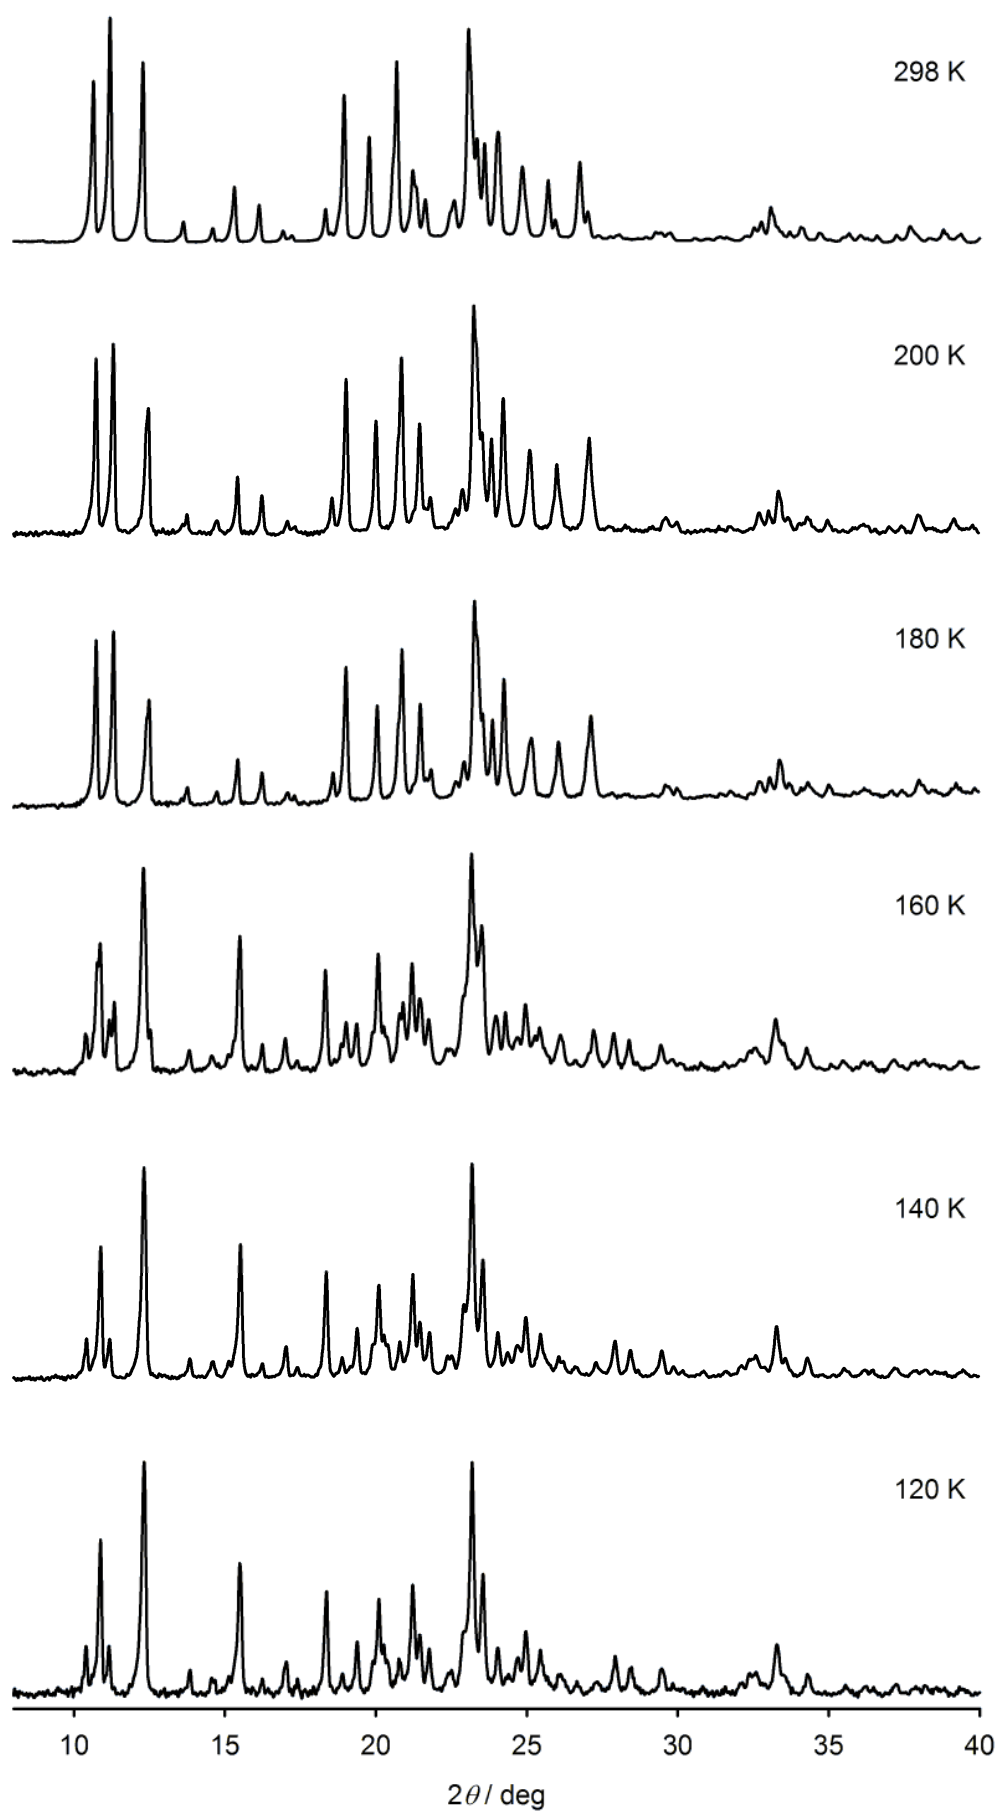

**Figure S5** Variable temperature X-ray powder patterns from **2** at 10-20 Torr pressure. The data are the same as in Fig. 5 of the main article. At 160 K, the sample contains a mixture of the high- and low-temperature phases, showing that the phase transition is in progress at this temperature.

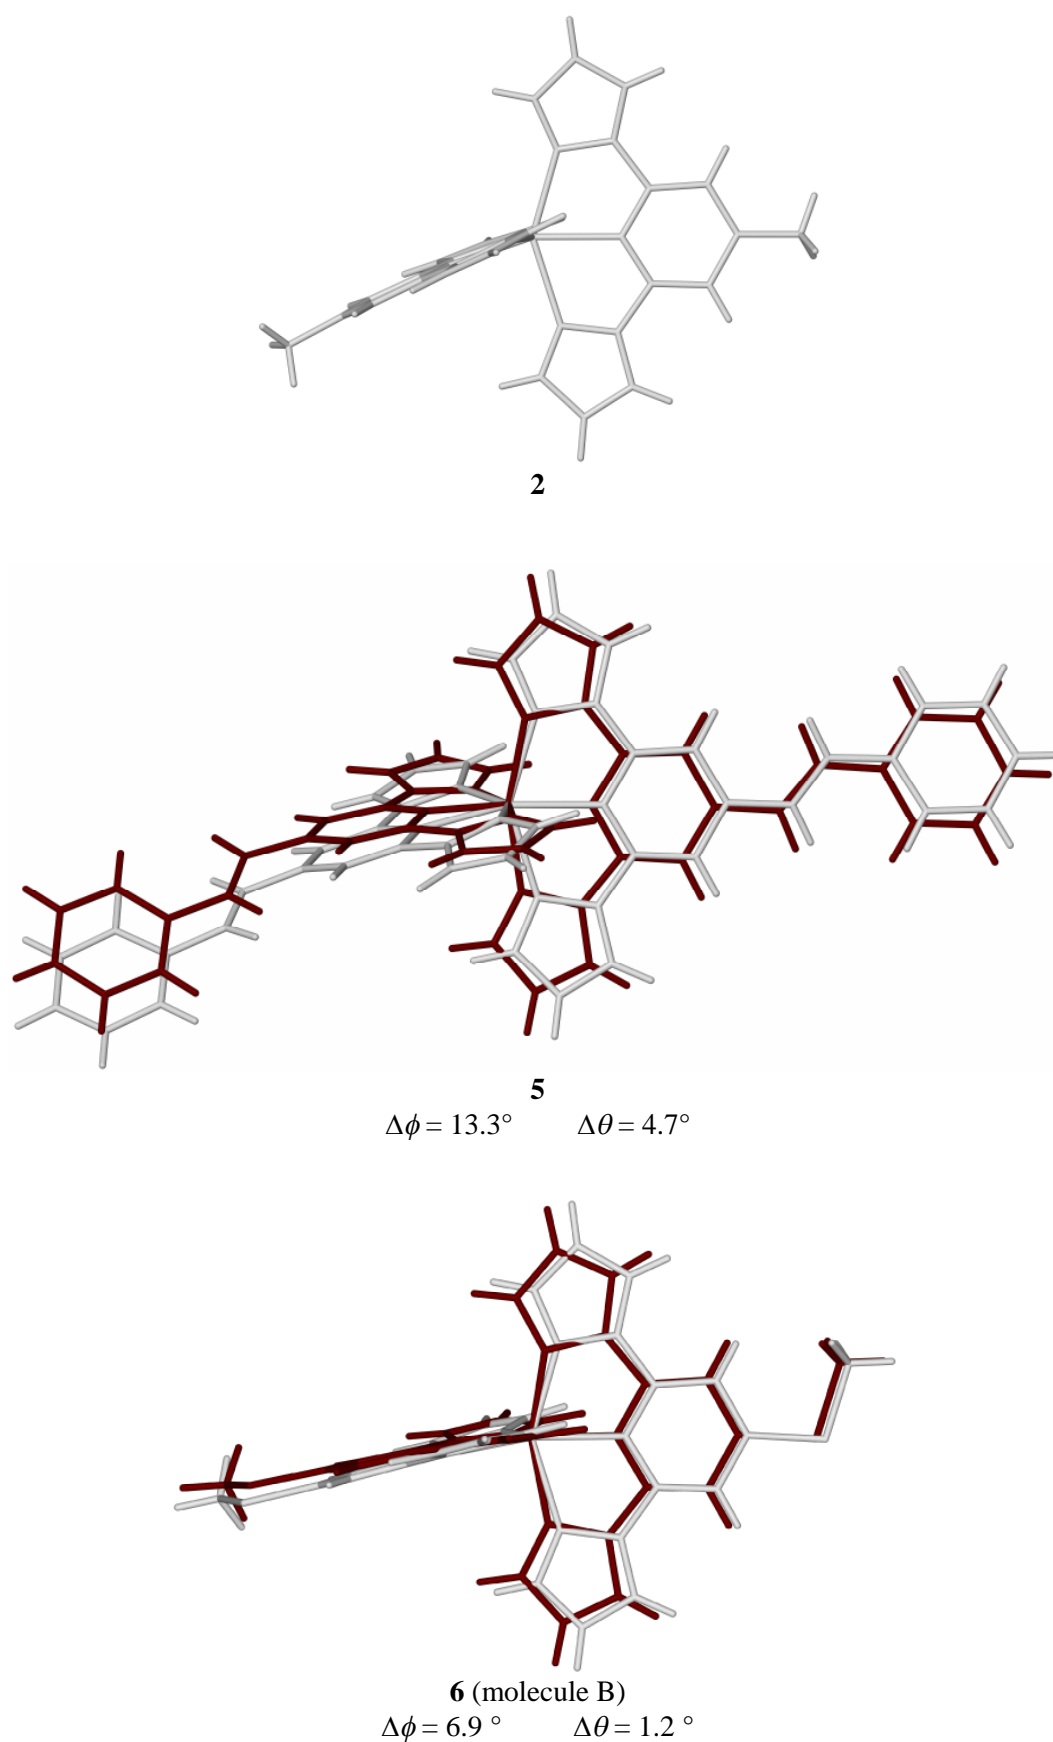

**Figure S6** Comparison of the high-spin structure of **2**, with the overlaid high-spin (white) and low-spin (red) molecular structures of **5**<sup>5</sup> and **6**.<sup>6</sup>

Although its low-spin form was not crystallographically characterized, comparable molecular structure changes are also likely during spin-crossover of **2** which would contribute to its thermal hysteresis.

**Table S4** Structural changes taking place during spin-crossover for  $[\text{Fe}(\text{1-bpp})_2]^{2+}$  and its derivatives, whose high-spin and low-spin crystal structures are available. See above, and Chart 1 of the main article, for the definitions of  $\phi$ ,  $\theta$ ,  $\Sigma$  and  $\Theta$ . The ligands referred to in the Table are shown in Chart S1 (next page). This is an updated version of the corresponding tables in refs. 3 and 4.

|                                                                                       | $T_{1/2}$ (K)         | $\Delta T_{1/2}$ (K) <sup>a</sup> | $\Delta\phi$ (°)        | $\Delta\theta$ (°)      | $\Delta\Sigma$ (°)        | $\Delta\Theta$ (°)      | Ref.      |
|---------------------------------------------------------------------------------------|-----------------------|-----------------------------------|-------------------------|-------------------------|---------------------------|-------------------------|-----------|
| $[\text{FeL}_2][\text{ClO}_4]_2$ ( <b>2</b> )                                         | 184                   | 18                                | –                       | –                       | –                         | –                       | This work |
| $[\text{Fe}(L^1)_2][\text{BF}_4]_2 \cdot (\text{CH}_3)_2\text{CO}$ ( <b>5</b> )       | 172                   | 15                                | 13.3                    | 4.7                     | 73.1                      | 216                     | 5         |
| $[\text{Fe}(L^2)_2][\text{BF}_4]_2$ ( <b>6</b> ), molecule B [molecule A]             | 269 [ $\approx 270$ ] | 2 [g]                             | 6.9 [0.0 <sup>b</sup> ] | 1.2 [1.0 <sup>b</sup> ] | 64.3 [50.2 <sup>b</sup> ] | 186 [141 <sup>b</sup> ] | 6         |
| $[\text{Fe}(\text{1-bpp})_2][\text{BF}_4]_2$                                          | 260                   | 3                                 | 5.2                     | 0.5                     | 64.7                      | 185                     | 7         |
| $[\text{Fe}(\text{1-bpp})_2][\text{Ni}(\text{mnt})_2]_2 \cdot \text{CH}_3\text{NO}_2$ | 170                   | 0-70 <sup>c</sup>                 | 0.5                     | 4.5                     | 63.8                      | 168                     | 8         |
| $[\text{Fe}(\text{1-bppy})_2][\text{BF}_4]_2 \cdot 3\text{CH}_3\text{NO}_2$           | 198                   | a <sup>d</sup>                    | 4.2                     | 0.18                    | 62.1                      | 180                     | 9         |
| $[\text{Fe}(L^3)_2][\text{ClO}_4]_2$                                                  | 233                   | 3                                 | 4.2                     | 0.14                    | 70                        | 192                     | 10        |
| $[\text{Fe}(L^4)_2][\text{BF}_4]_2$                                                   | 202                   | 3                                 | 3.1                     | 0.18                    | 67.8                      | 190                     | 11        |
| $[\text{Fe}(L^5)_2][\text{BF}_4]_2$                                                   | 147                   | 6 <sup>e</sup>                    | 3.4                     | 5.5                     | 60.2                      | 177                     | 12        |
| $[\text{Fe}(L^5)_2][\text{ClO}_4]_2$                                                  | 267                   | vg                                | 1.0 <sup>b</sup>        | 0.2 <sup>b</sup>        | 50.2 <sup>b</sup>         | 153 <sup>b</sup>        | 13        |
| $[\text{Fe}(L^6)_2][\text{BF}_4]_2$                                                   | 235                   | g, g <sup>f</sup>                 | 0                       | 0                       | 56.3                      | 151                     | 9, 14     |
| $[\text{Fe}(L^6)_2][\text{ClO}_4]_2$                                                  | 196                   | a, g <sup>f</sup>                 | 0                       | 0                       | 60.0                      | 164                     | 9, 14     |
| $[\text{Fe}(L^7)_2][\text{BF}_4]_2$                                                   | 271                   | g                                 | 1.13                    | 0.16                    | 56.4                      | 157                     | 10, 15    |
| $[\text{Fe}(L^7)_2][\text{ClO}_4]_2$                                                  | 284                   | g                                 | 0.3                     | 0.62                    | 54                        | 152                     | 10        |
| $\beta$ - $[\text{Fe}(L^8)_2][\text{BF}_4]_2$                                         | 272                   | g                                 | 5.9                     | 0.2                     | 60.0                      | 173                     | 16        |
| $[\text{Fe}(L^9)_2][\text{BF}_4]_2$                                                   | 307                   | g                                 | 1.3                     | 0.04                    | 63.2                      | 176                     | 6         |
| $[\text{Fe}(L^{10})_2][\text{BF}_4]_2$                                                | 341                   | 8                                 | 5.3 <sup>g</sup>        | 5.52 <sup>g</sup>       | 74.1 <sup>g</sup>         | 200 <sup>g</sup>        | 17        |

<sup>a</sup>a = abrupt, no hysteresis; g = gradual; vg = very gradual. <sup>b</sup>may be slightly under-estimated, since either a fully low-spin or fully high-spin crystal structure was not achieved. <sup>c</sup>Structured hysteresis loop. <sup>d</sup>Abrupt spin-transition from crystallographic measurements, but the presence of hysteresis was not determined. <sup>e</sup>First step of a two-stage spin-crossover, involving a re-entrant symmetry breaking phase transition. The second step occurs sluggishly, to the extent that its temperature could not be accurately determined. <sup>f</sup>Two step transition from a single iron site, with a discontinuity at 50 % conversion. <sup>g</sup>Compound undergoes a phase change during spin-crossover, with one unique molecule in the high-spin phase and two unique molecules in the low-spin phase. Values given are the averaged values across the two low-spin molecules.

The parameter that correlates most strongly with the observation of spin-crossover hysteresis in these compounds is  $\Delta\theta$ .

**Chart S1** Ligands referred to in Table S4.

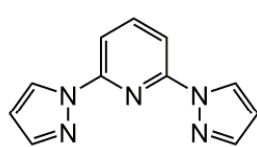

1-bpp

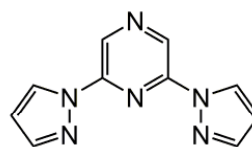

1-bppyz

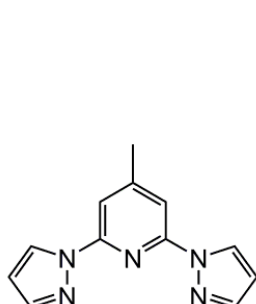

$L$

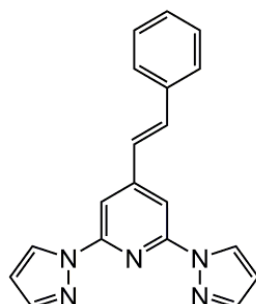

$L^1$

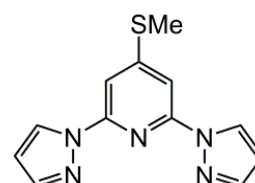

$L^2$

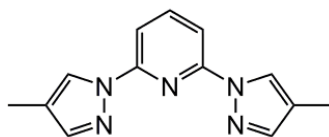

$L^3$

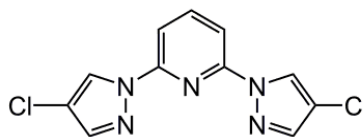

$L^4$

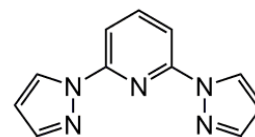

$L^5$

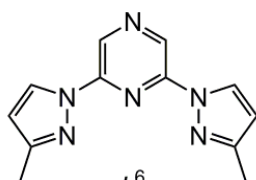

$L^6$

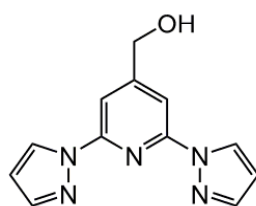

$L^7$

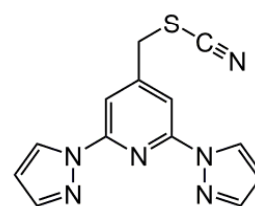

$L^8$

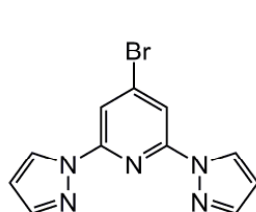

$L^9$

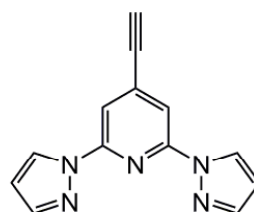

$L^{10}$

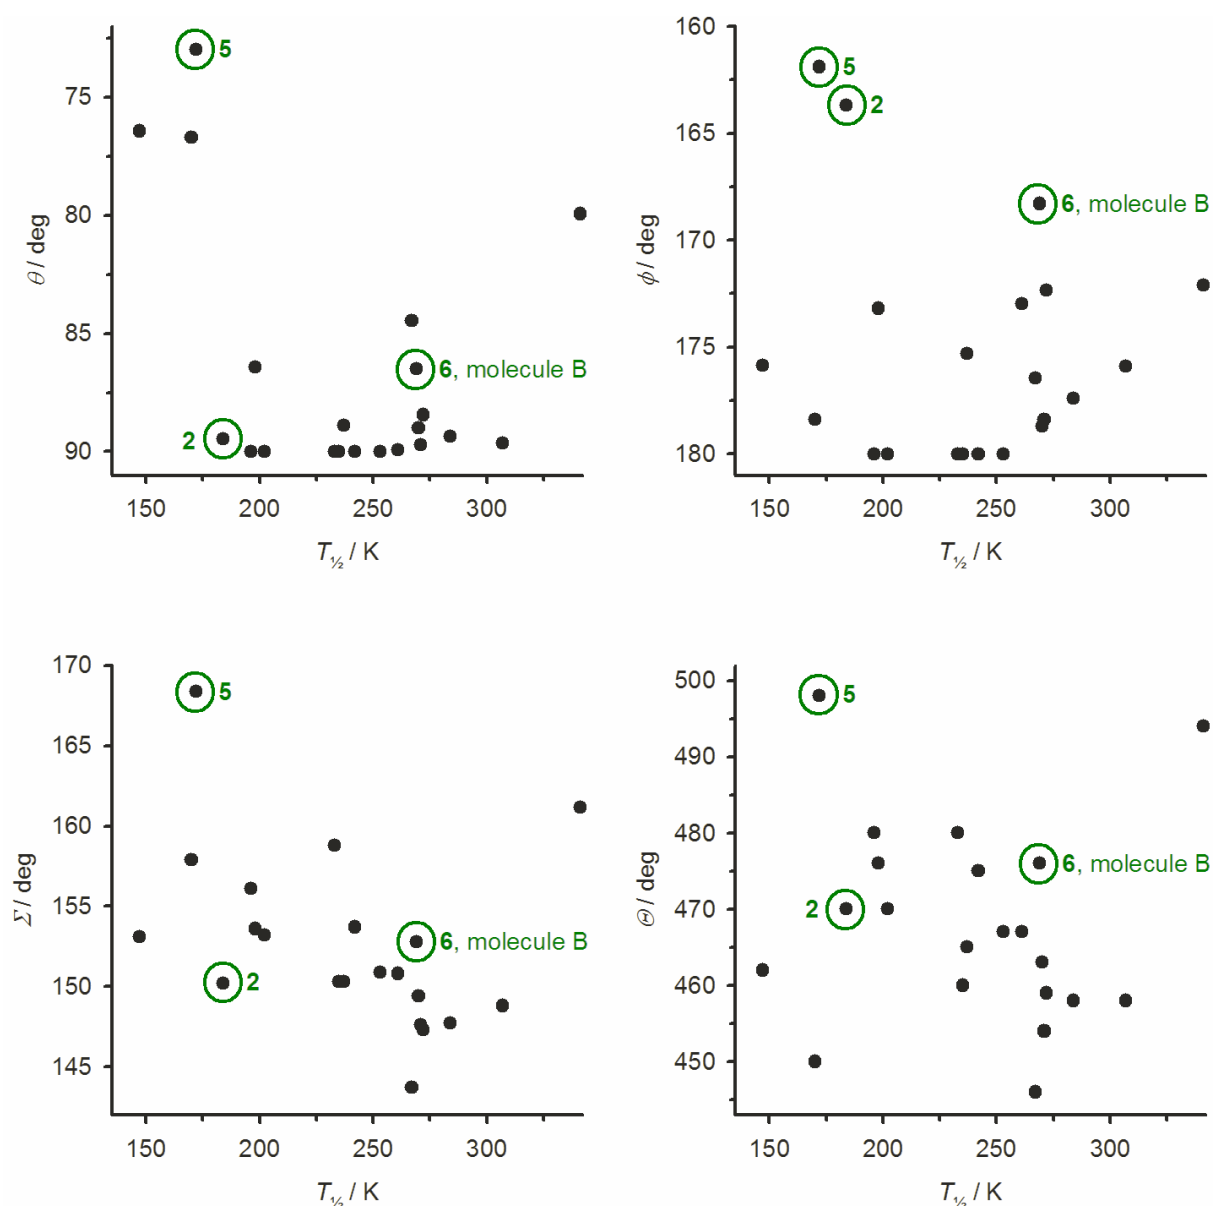

**Figure S7** Plots of  $T_{1/2}$  for solid  $[\text{Fe}(\text{1-bpp})_2]^{2+}$  derivatives against the distortion parameters  $\theta$ ,  $\phi$ ,  $\Sigma$  and  $\Theta$  of the high-spin state of the complexes. Data are taken from refs. 3-6 and 15-19.

Definitions of  $\theta$  and  $\phi$  are in Chart 1 of the main article, while  $\Sigma$  and  $\Theta$  are defined at the beginning of this Supporting Information document. The graphs are each plotted so that the y axis indicates an increasing structural distortion.

A literature study of complexes of type  $[\text{Fe}(\text{NCS})_2\text{L}_2]$  ( $\text{L}$  = a bidentate N-donor ligand) found a good linear relationship between  $T_{1/2}$  and a parameter related to  $\Theta$ .<sup>20</sup> The graphs for  $\Sigma$  vs.  $T_{1/2}$  and  $\Theta$  vs.  $T_{1/2}$  may indicate a similar relationship in the main body of the data, although there are a lot of outliers. [ $\Sigma$  and  $\Theta$  are strongly correlated in  $[\text{Fe}(\text{1-bpp})_2]^{2+}$  complexes when  $\Theta < \text{ca. } 500^\circ$ ].<sup>2</sup>

A more detailed experimental and computational study of this question, taking into account perturbations of  $T_{1/2}$  caused by the inductive properties of ligand substituents in the different compounds, is in progress.

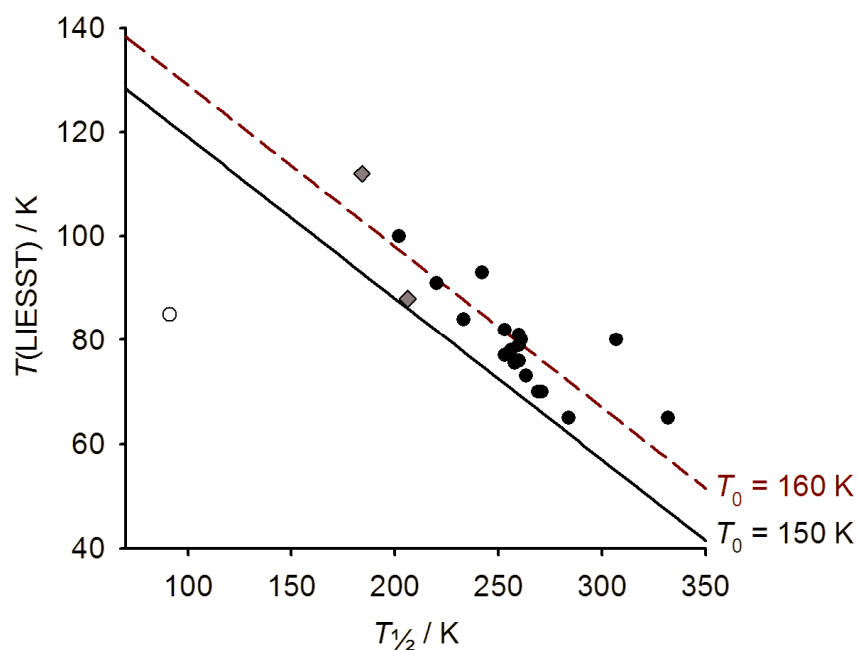

**Figure S8** Relationship between  $T_{1/2}$  and  $T(\text{LIESST})$  for compounds from the  $[\text{Fe}(\text{1-bpp})_2]^{2+}$  series, measured by these authors.<sup>4,6,10,12,18,19,21</sup>

Gray diamonds: **1** and **2** (this work).

Black circles: previously published compounds that show an inverse relationship between  $T_{1/2}$  and  $T(\text{LIESST})$ .

White circle: one previously published compound that deviates strongly from the relationship, reflecting some unique structural chemistry related to its particularly low  $T_{1/2}$  value.<sup>12</sup>

The previously proposed empirical relationship between these parameters,  $T_{1/2} = T_0 - 0.3T(\text{LIESST})$  with  $T_0 = 150 \text{ K}$ , is shown as a black solid line.<sup>10,23</sup> A modified correlation with  $T_0 = 160 \text{ K}$  (red dashed line) in fact fits these data more closely (the  $T_0 = 150 \text{ K}$  relationship was originally formulated based on other compounds with a closely related, but different, ligand type).<sup>22</sup>

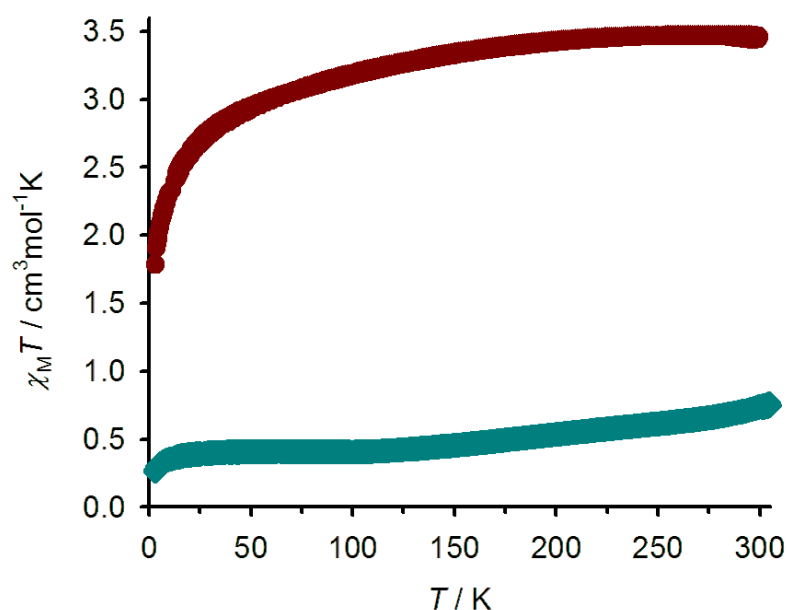

**Figure S9** Variable temperature magnetic susceptibility data for **3** (red) and **4**·½H<sub>2</sub>O (cyan).

Solid **3** is high-spin over the complete temperature range, which is consistent with its crystal structure. The decrease in  $\chi_M T$  at low temperatures reflects zero-field splitting of the high-spin centers, and is not related to spin-crossover.

Compound **4**·½H<sub>2</sub>O is *ca.* 80 % low-spin at room temperature, with a very gradual spin-equilibrium occurring upon cooling. Around 10 % of this material remains frozen in its high-spin state below 100 K, with a small zero-field splitting feature below 50 K as above.

## References

- (1) McCusker, J. K.; Rheingold, A. L.; Hendrickson, D. N. *Inorg. Chem.* **1996**, *35*, 2100–2112.
- (2) Guionneau, P.; Marchivie, M.; Bravic, G.; Létard, J.-F.; Chasseau, D. *Top. Curr. Chem.* **2004**, *234*, 97–128.
- (3) Halcrow, M. A. *Chem. Soc. Rev.* **2011**, *40*, 4119–4142.
- (4) Halcrow, M. A. *Coord. Chem. Rev.* **2009**, *253*, 2493–2514.
- (5) Hasegawa, Y.; Sakamoto, R.; Takahashi, K.; Nishihara, H. *Inorg. Chem.* **2013**, *52*, 1658–1665.
- (6) Kershaw Cook, L. J.; Shepherd, H. J.; Comyn, T. P.; Baldé, C.; Cespedes, O.; Chastanet, G.; Halcrow, M. A. *Chem. Eur. J.* **2015**, *21*, 4805–4816.
- (7) Holland, J. M.; McAllister, J. A.; Lu, Z.; Kilner, C. A.; Thornton-Pett, M.; Halcrow, M. A. *Chem. Commun.*, **2001**, 577–578.
- (8) Nihei, M.; Tahira, H.; Takahashi, N.; Otake, Y.; Yamamura, Y.; Saito, K.; Oshio, H. *J. Am. Chem. Soc.* **2010**, *132*, 3553–3560.
- (9) Elhaïk, J.; Money, V. A.; Barrett, S. A.; Kilner, C. A.; Evans, I. R.; Halcrow, M. A. *Dalton Trans.* **2003**, 2053–2060.
- (10) Carbonera, C.; Costa, J. S.; Money, V. A.; Elhaïk, J.; Howard, J. A. K.; Halcrow, M. A.; Létard, J.-F. *Dalton Trans.* **2006**, 3058–3066.
- (11) Pritchard, R.; Kilner, C. A.; Halcrow, M. A. *Chem. Commun.* **2007**, 577–579.
- (12) Money, V. A.; Carbonera, C.; Elhaïk, J.; Halcrow, M. A.; Howard, J. A. K.; Létard, J.-F. *Chem. Eur. J.* **2007**, *13*, 5503–5514.
- (13) Elhaïk, J.; Kilner, C. A.; Halcrow, M. A. *Eur. J. Inorg. Chem.* **2014**, 4250–4253.
- (14) Money, V. A.; Elhaïk, J.; Evans, I. R.; Halcrow, M. A.; Howard, J.A.K. *Dalton Trans.* **2004**, 65–69.
- (15) Money, V. A.; Elhaïk, J.; Halcrow, M. A.; Howard, J.A.K. *Dalton Trans.* **2004**, 1516–1518.
- (16) Haryono, M.; Heinemann, F. W.; Petukhov, K.; Gieb, K.; Müller, P.; Grohmann, A. *Eur. J. Inorg. Chem.* **2009**, 2136–2143.
- (17) Šalitroš, I.; Fuhr, O.; Eichhöfer, A.; Kruk, R.; Pavlik, J.; Dlhán, L.; Boča, R.; Ruben, M. *Dalton Trans.* **2012**, *41*, 5163–5171.
- (18) Pritchard, R.; Lazar, H.; Barrett, S. A.; Kilner, C. A.; Asthana, S.; Carbonera, C.; Létard, J.-F.; Halcrow, M. A. *Dalton Trans.* **2009**, 6656–6666.
- (19) Mohammed, R.; Chastanet, G.; Tuna, F.; Malkin, T. L.; Barrett, S. A.; Kilner, C. A.; Létard, J.-F.; Halcrow, M. A. *Eur. J. Inorg. Chem.* **2013**, 819–831.
- (20) Marchivie, M.; Guionneau, P.; Létard, J.-F.; Chasseau, D. *Acta Cryst. Sect. B* **2005**, *61*, 25–28.
- (21) Chastanet, G.; Tovee, C. A.; Hyett, G.; Halcrow, M. A.; Létard, J.-F. *Dalton Trans.* **2012**, *41*, 4896–4902.
- (22) Marcen, S.; Lecren, L.; Capes, L.; Goodwin, H. A.; Létard, J.-F. *Chem. Phys. Lett.* **2002**, *358*, 87–95.
